# Supplementary material for: Observations of brine plumes below Arctic sea ice
Source: Copernicus journal article supplement (doi:10.5194/os-2017-27), 2017-05-08
Supplement: Supplementary file 1 [file os-2017-27-supplement.zip]

Archive with 5 entries (5 files):
- Cohen et al JGRA revised.pdf
- grl_manus.pdf
- grl_response_to_reviewers.pdf
- Meyer et al., NICE2015_heat_flux_paper_rev1_JGR_submitted_Feb2017.pdf
- Technical Report Ice Ridges (UNIS, Aleksey).pdf
