# Supplementary material for: Observations of brine plumes below Arctic sea ice
Source: Copernicus journal article supplement (doi:10.5194/os-2017-27), 2017-05-08
Supplement: Supplementary file 1 [file os-2017-27-supplement.zip › Technical Report Ice Ridges (UNIS, Aleksey).pdf]

## UNIS

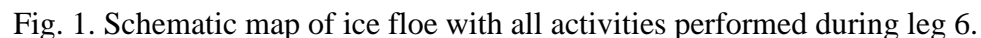

## Ridge Studies

Table 1 shows the schedule of work on ice ridges.

Table 1. Ridge activities.

| Date        | R1       |                                      | R2       |                                   |
|-------------|----------|--------------------------------------|----------|-----------------------------------|
|             | activity | file name                            | activity | file name                         |
| 10 Jun 2015 | MP, ST   | <a href="#">2015_06_10_R1_MP_ST</a>  |          |                                   |
| 12 Jun 2015 |          |                                      | MP       | <a href="#">2015_06_12_R2_MP</a>  |
|             |          |                                      | OTB      | not available yet                 |
| 13 Jun 2015 | Kompis   | <a href="#">2015_06_13_R1_kompis</a> |          |                                   |
|             | GEM      | not available yet                    |          |                                   |
| 17 Jun 2015 | STD      | <a href="#">2015_06_17_R1_STD</a>    | STD      | <a href="#">2015_06_17_R2_STD</a> |
|             | MP       | <a href="#">2015_06_17_R1_MP</a>     |          |                                   |

MP – morphology mapping / profiling with 2" augers

STD – salinity, temperature, density core

OTB – Oceanic Thermistor Buoy deployment

Kompis – uniaxial compression tests

GEM – electromagnetic profiling

Ridge R1 was mapped (MP) and cored (STD) on June 10<sup>th</sup>, and then one week later on June 17<sup>th</sup>. Uniaxial compression tests and electromagnetic profiling were performed only once and only on ridge R1 on June 13<sup>th</sup>.

Ridge R2 was mapped (MP) on June 12<sup>th</sup>. After what the decision to deploy OTB on ridge R2 was made and OTB was deployed on June 12<sup>th</sup> (~ 11:00 UCT). Later on June 17<sup>th</sup> ridge R2 was cored (STD).

Fig. 2 presents morphology maps of ice ridges R1 and R2, as they were mapped at first time. More details and data on each activity and some plots can be found in files according to Table 1. All activities, such as STD coring, uniaxial compression coring and OTB deployment took place always near 0m profile of the cross section of corresponding ridge.

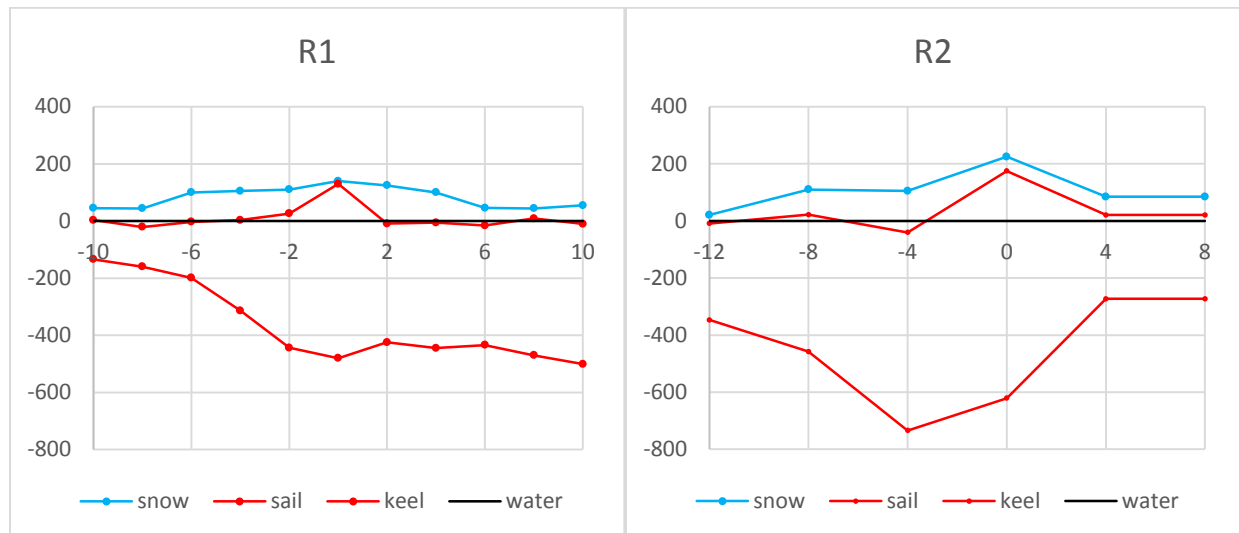

Figure 2. Morphology maps of ice ridges R1 and R2 (horizontal axis is in meters, vertical axis is in centimeters).

## Melt Ponds Measurements

Table 2 shows schedule of melt pond measurements.

Table 2. Melt pond measurements.

| Melt Pond   | Date and Time                                                | Instruments | Files                                     |
|-------------|--------------------------------------------------------------|-------------|-------------------------------------------|
| MP1 (10 cm) | 19:50 12 <sup>th</sup> - 14:40 13 <sup>th</sup><br>June 2015 | SBE         | <a href="#">2015_06_11-13_MP1_SBE.asc</a> |
|             |                                                              | CTS         | <a href="#">2015_06_11-13_MP1_CTS.dat</a> |
| MP2 (5 cm)  | 19:00 15 <sup>th</sup> – 19:00 17 <sup>th</sup><br>June 2015 | SBE         | <a href="#">2015_06_15-17_MP2_SBE.asc</a> |
|             |                                                              | CTS         | <a href="#">2015_06_15-17_MP2_CTS.dat</a> |
|             |                                                              | TS          | <a href="#">2015_06_15-17_MP2_TS.dat</a>  |
| MP3 (20 cm) | 19:00 17 <sup>th</sup> – 08:40 19 <sup>th</sup><br>June 2015 | SBE         | <a href="#">2015_06_17-19_MP3_SBE.asc</a> |
|             |                                                              | CTS         | <a href="#">2015_06_17-19_MP3_CTS.dat</a> |
|             |                                                              | TS          | <a href="#">2015_06_17-19_MP3_TS.dat</a>  |

SBE – SBE 39Plus (Sea-Bird Electronics, US)

CTS – Conductivity sensor 3919A (Aanderaa, NO)

TS – Thermistor string (Geo Precision, DE)

Melt pond MP1 was covered with snow sometime during the night 12-13 June (Storm, snowdrift). MP2 has not developed much during the time of measurements. MP3 was the biggest and measurements there were interrupted by ice floe brake up. Table 3 shows melt ponds MP1-3 in the beginning and at the end of experiments and the set up of instruments in it.

## Coring Samples

During Leg 6 samples of 7.2 cm in diameter were cored from site #1 and site #3. One zarges box was filled with samples (approximately half from site #1 and half from site #3). All samples were marked with standard note and packed into plastic bags. Samples are intended to be used during laboratory work at UNIS to study stratigraphy and mechanical properties of ice. During leg 5 another box was filled with samples (see report from leg 5).

Table 3. Melt ponds MP1-3 in the beginning and at the end of experiments. Location of the instruments.

|                                                                                                |                                                                                      |
|------------------------------------------------------------------------------------------------|--------------------------------------------------------------------------------------|
| 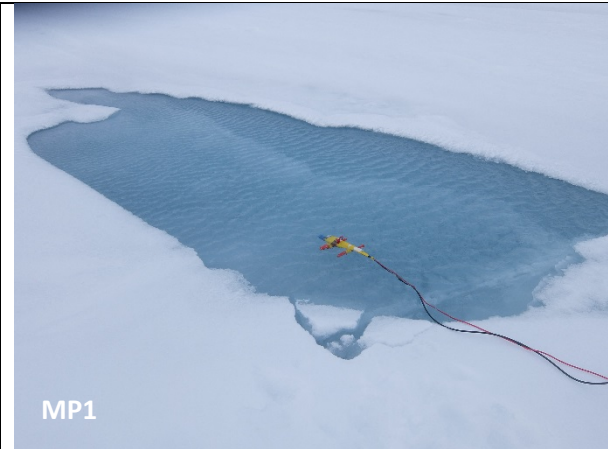 <p>MP1</p>   | <p>N/A, covered by snow of 10-15 cm thickness</p>                                    |
| 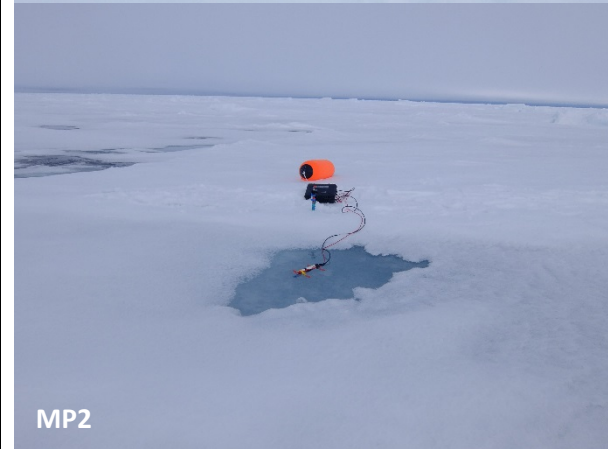 <p>MP2</p>  | 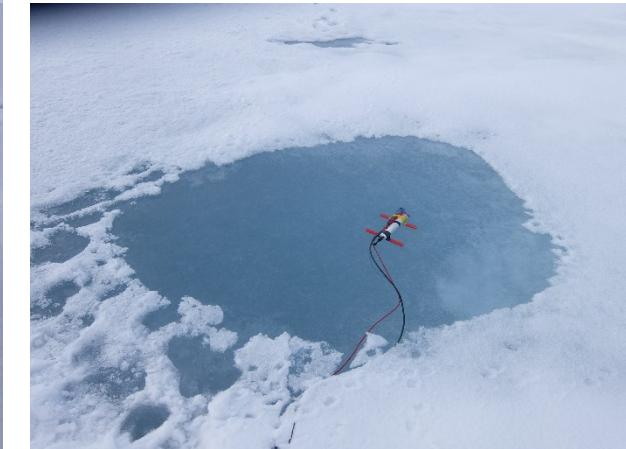  |
| 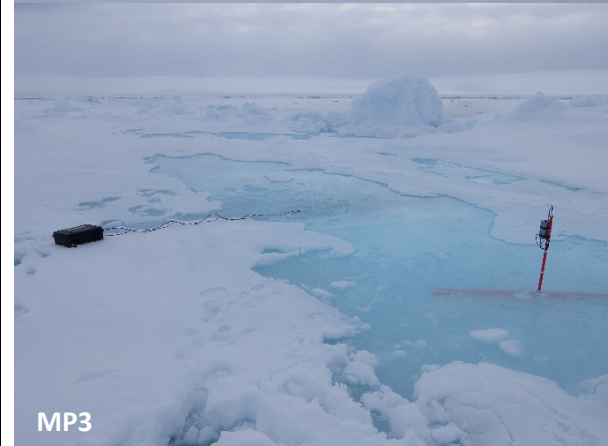 <p>MP3</p> | 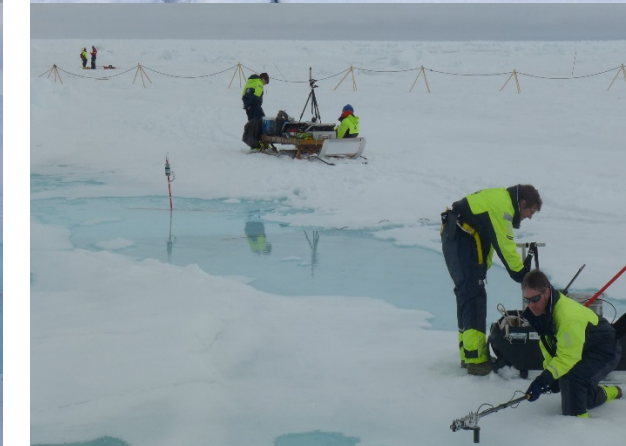 |
